# Supplementary material for: Stability of iron-bearing carbonates in the deep Earth’s interior
Source: PubMed Central journal article supplement (PMC5524932; doi:10.1038/ncomms15960), 2017-07-19
Supplement: ncomms15960-s2.pdf [file ncomms15960-s2.pdf]

## Reviewers' Comments:

### Reviewer #1 (Remarks to the Author)

This manuscript, submitted by Cerantola and co-authors, is potentially a very nice paper reporting the structures and stability of two "new" tetrahedrally co-ordinated carbonates that form from a  $\text{FeCO}_3$  precursor at lower mantle conditions. The authors performed laser-heated diamond anvil cell experiments on synthetic single crystals of  $\text{FeCO}_3$  at a range of PT conditions. Their results include reports of the HS-LS transition in siderite, bracketing of the melting temperature and subsequent dissociation of siderite, in-situ Mössbauer of  $\text{FeCO}_3$  and its high PT products. These are in addition to the formation conditions and structure of  $\text{Fe}_4\text{C}_3\text{O}_{12}$  and  $\text{Fe}_4\text{C}_4\text{O}_{13}$  which are the "new and exciting" results of this work, however I note both that the latter carbonate is the iron end-member composition of the tetrahedral carbonate reported by Merlini et al (2015). Additionally, I believe there are some significant omissions, particularly in the methods description and of essential data, which must be provided for publication. These additions are necessary to fully assess the robustness and reliability of the results, which is especially important given the authors appear to demonstrate the structures provided in a previous paper were incorrectly refined. However, both the stability and crystal chemistry of the new phases are reasonable, so I see no reason why this should not, with revisions, become a good publication. Below I outline my suggested amendments and comments.

1. The authors report the discovery of a never-seen-before carbonate phase, with a structure that is, to the authors knowledge, different from any other compounds. The lattice parameters, structure, chemistry and stoichiometry are all determined based entirely on the refinement of a diffraction pattern collected at 97 GPa, however this pattern is not included in this submission. This makes it very hard to truly evaluate the quality of the refinement or the data - I believe this must be added before publication, possibly in supplementary information (SI).

The starting materials in experiments are single crystals of  $\text{FeCO}_3$ , however it is unclear whether the product  $\text{Fe}_4\text{C}_3\text{O}_{12}$  is also a single crystal, or a powder. The authors suggest it is a single crystal, but without a 2D diffraction image it seems more likely, especially considering the different stoichiometry of the product, to either be a powder or multiple/twinned crystals.

There is very little information provided in the Methods to indicate how the authors proceeded from a diffraction pattern to full refinement of crystal chemistry. Whilst I understand how this is feasible, some indication of the steps taken, including any assumptions made and the reasons for such assumptions should be described in detail, e.g. did the authors use the refined unit cell volumes to guide stoichiometry, how many missing reflections of the predicted reflections were there, were there any extra reflections, how did they deal with peaks from unreacted  $\text{FeCO}_3$  starting materials etc. Some of these assumptions lead to the conclusion that all the iron in this phase is ferric, however, if this is the case why are there four components of the Mössbauer spectra in Fig S2a? Surely there should be one from  $\text{FeCO}_3$  and two from  $\text{Fe}_4\text{C}_3\text{O}_{12}$ , and the spectra suggests the phase is magnetic unless I am mistaken? The authors should comment on this?

It is also notable that the quality of the refinement for  $\text{Fe}_4\text{C}_3\text{O}_{12}$  is significantly worse than that for  $\text{Fe}_4\text{C}_4\text{O}_{13}$  (larger GooF, R1). Why is this? This should be discussed. Also, the text says there were ~300 independent reflections, but Table S1 suggests > 1700...

Given this is the first ever report of this structure, it is rather hard to visualise the structure using fig 2 alone. Perhaps more views of the structure could be added in SI.

It is assumed that this phase is produced in addition to diamond, is there any evidence for this in the form of Debye rings in the diffraction. The authors do mention Raman spectra, but do not show them, this would be helpful.

2. The methods, in general, are extremely brief. In order to find out several pieces of key information it was necessary to look up other papers, and I remain uncertain of several points. The

authors shouldn't make it hard for readers in this way.

How was it verified that there was no temperature gradient across the sample? For instance, the normal setup on ID-27 (ESRF) uses a 2-5 micron pinhole, and therefore you cannot check this easily. Do the other setups used also collect temperatures using a pinhole, or do they use a 1D slit, collecting a profile across the whole sample? Are there examples of these profiles?

Is it known whether the starting material contain no Fe<sup>3+</sup>? As there is a mixed singlet/doublet spectrum at RT at 44 GPa, which could be in the starting material, or a partial transition from HS to LS.

Was recovery of the samples attempted? If so, is it known when they become amorphous/back transformed? Is this why chemical analysis using FIB, or other, wasn't attempted? Or was it attempted, as this would significantly strengthen the case for a completely new stoichiometry and chemistry.

How many independent experiments were there, and what was their individual PT paths? This particular info would be very helpful if included in a table.

How many and which diffraction patterns were single crystal, and how many were powder patterns?

The caption of fig S3 says see methods to explain something that isn't present.

3. The structural transformation sequences of the new tetrahedral carbonates are rather confusingly presented at the moment. This isn't helped by the confusing nature of Figure 1, and the poorly defined colours of the various symbols, I think there is an opacity/layering problem that is affecting the printed colours. Perhaps a key would be useful, rather than just a figure caption description? A record of the PT paths of each experiment would also be helpful, perhaps as arrows on the figures.

Are the oxide phases that form in addition to Fe<sub>4</sub>C<sub>4</sub>O<sub>13</sub> always consistent? It is mentioned that they can sometimes be refined from xrd, can we see an example pattern.

Line 324 suggests that FeCO<sub>3</sub> transforms directly to Fe<sub>4</sub>C<sub>4</sub>O<sub>13</sub>, which is misleading because throughout other parts of the manuscript it is argued that it forms from reaction of Fe<sub>4</sub>C<sub>3</sub>O<sub>12</sub>, so without this precursor it would not form.

Is there evidence for the growth of Fe<sub>4</sub>C<sub>4</sub>O<sub>13</sub> at the expense of Fe<sub>4</sub>C<sub>3</sub>O<sub>12</sub>, such as the strengthening/weakening of diffraction peaks.

Are both products always single crystals, as the authors suggest?

Do you ever completely get rid of FeCO<sub>3</sub> and Fe<sub>4</sub>C<sub>3</sub>O<sub>12</sub> in the high T samples with Fe<sub>4</sub>C<sub>4</sub>O<sub>13</sub>? If this was the case the final product in the DAC must contain CO<sub>2</sub>, diamond and an Fe-oxide (e.g. Fe<sub>3</sub>O<sub>4</sub>) alongside the Fe<sub>4</sub>C<sub>4</sub>O<sub>13</sub>. If there are Raman spectra is there evidence of this?

4. The order of discussion is a bit clunky. I wanted discussion of potential decomposition/formation reactions for the various phases to be much earlier, or at least nearer to the description of the results they are relevant to. I would move the discussion about fitting the data of Liu et al to after the interpretation of your own results. Whilst the discussion in 2259-281 seemed like it was out of place.

5. From reading the manuscript it is apparent that, if these tetrahedral carbonate phases are going to form in the mantle, they will have to do so initially from carbonates in cold slabs (if the reactions you propose are correct). But it is also apparent from the structural fit of Liu et al's data, that both phases form extensive solid solutions with Mg endmembers. In the case of tetrairon orthocarbonate, it is clear that Mg significantly expands its stability field at the expense of the diiron diiron tetracarbonate structure, and to higher T. This goes completely unmentioned at the moment. Clearly, given the stability fields of the various carbonates, there is a clear PT path that must be followed for these new phases to form, but once existing they might remain at geotherm temperatures. This should be discussed more, and is one of the most significant implications of this work.

6. In lines 165-183 incongruent melting is discussed. The authors, like previous authors, suggest that dissociation of carbonate produces diamond + oxides. However, in this case, the current

results clearly show this "dissociation" occurs above the melting temperature. There is no clear evidence that this is an equilibrium reaction, or whether it is a quench phenomenon related to the DAC. It is possible it is related to diffusion in a large thermal gradient, that is accelerated in the presence of melt. It is certainly clear that it is not dissociation of siderite, this should be clarified.

7. From the data provided, the values in lines 293 and 294 should be 35.9 and 13.1 respectively.

Line 44: Oceanic sediments are not the only flux of carbon into the mantle, much comes from the oceanic crust and mantle beneath.

Line 46: There is no evidence that the diamond-hosted carbonates (calcite and dolomite) reported in Kaminsky 2012 come from the lower mantle. Those carbonate inclusions are in diamonds with no other reported inclusions. Thus they categorically do not prove that carbonates exist in the lower mantle, and I therefore believe this reference is confusing. The nyerereite and nahcolite inclusions also mentioned in this paper are actually described by Kaminsky (2009, *Min Mag*) and were reported as "lower mantle" carbonates. There are other references that report lower mantle carbonate inclusions, which may or may not actually be from the LM. Several carbonate microinclusions have been reported in diamonds containing ferropericlase with magnesite exsolution (e.g. Kaminsky, *Can Mineralogist*, 2015; Kaminsky, *Mineral Petrology*, 2015); many authors are currently arguing that these must represent lower mantle samples because of magnetite exsolution observed within the inclusions, however this still seems far from clear to me. Magnesite was reported in a diamond with another inclusion interpreted as "former bridgmanite" (Thomson CTMP 2014). Also, Brenker et al (2007) (EPSL) reported carbonates in equilibrium with "former calcium perovskite", which may have been from the lower mantle.

Line 60: I don't think Rohrbach and Schmidt actually show slabs will be more oxidised than surrounding mantle.

Line 361: Kelemen and Manning 2015 actually appear to conclude, based on their figure 5, that somewhere between none and almost all of the carbonate in slabs is subducted into the mantle.

There is at least one mistake in Table S4. The final entry was at 97 GPa.

28th July 2016.

Reviewer #2 (Remarks to the Author)

In this work the authors investigated the behavior of  $\text{FeCO}_3$  at pressures over 100 GPa and temperatures over 2500 K in a laser-heated diamond anvil cell using a combination of single crystal X-ray diffraction and Mössbauer spectroscopy. The key finding is the discovery of two new Fe-bearing carbonates,  $\text{Fe}_4\text{C}_3\text{O}_{12}$  and  $\text{Fe}_4\text{C}_4\text{O}_{13}$  which is isostructural with recently reported  $\text{Mg}_{1.6}\text{Fe}_{2.4}\text{C}_4\text{O}_{13}$  by Merlini et al. (2015). The latter observation suggests that ca. 35% of magnesium may be incorporated in the structure and that this structure may be an important phase to consider in the Earth's deep interior. The authors conclude that the conditions in the Earth's lower mantle may not lead to full decomposition of Fe-based carbonates - at least over the time-range of the experiments performed.

While the authors attempt to relate these and other findings to the stability of iron-bearing carbonates in the Earth's deep interior, I found that the manuscript deviated from this theme and lost its coherency. I suggest, for example, that the details of structure and crystal chemistry of the newly-discovered iron carbonates be published in another manuscript. The details of the spin transition do not need a separate section. The manuscript should focus on the stability and the thermodynamic conditions of the decarbonation process in magnesium and iron-bearing carbonates. However, while this manuscript provides intriguing new details, this remains poorly constrained as seen in Figure 1 which attempts to compile all known data. The reactions depend

critically upon the redox conditions and a further discussion of this subject is warranted. Thus, in its existing form, I cannot recommend that the manuscript be accepted for publication.

1 **Reviewer #1**

2 “This manuscript, submitted by Cerantola and co-authors, is potentially a very nice paper  
3 reporting the structures and stability of two "new" tetrahedrally co-ordinated carbonates that  
4 form from a FeCO<sub>3</sub> precursor at lower mantle conditions. The authors performed laser-heated  
5 diamond anvil cell experiments on synthetic single crystals of FeCO<sub>3</sub> at a range of PT  
6 conditions. Their results include reports of the HS-LS transition in siderite, bracketing of the  
7 melting temperature and subsequent dissociation of siderite, in-situ Mössbauer of FeCO<sub>3</sub> and its  
8 high PT products.“

9

10 We appreciate that Reviewer #1 recognized the potential significance of our results.

11

12 “These are in addition to the formation conditions and structure of Fe<sub>4</sub>C<sub>3</sub>O<sub>12</sub> and Fe<sub>4</sub>C<sub>4</sub>O<sub>13</sub>  
13 which are the "new and exciting" results of this work, however I note both that the latter  
14 carbonate is the iron end-member composition of the tetrahedral carbonate reported by Merlini et  
15 al (2015).”

16

17 We clearly stated in the paper that Fe<sub>4</sub>C<sub>4</sub>O<sub>13</sub> is isostructural with Mg<sub>2</sub>Fe<sub>2</sub>C<sub>4</sub>O<sub>13</sub>, and we provide  
18 appropriate reference (ref. 23) (and we also explain why we consider the synthesis of pure iron  
19 compound Fe<sub>4</sub>C<sub>4</sub>O<sub>13</sub> important). Fe<sub>4</sub>C<sub>3</sub>O<sub>12</sub> on the other hand was synthesized by us for the first  
20 time. As Reviewer #1 certainly noticed, Dr. Marco Merlini is co-author of the present work, and  
21 we are sure he never published findings of the same phase before.

22

23 “ The authors report the discovery of a never-seen-before carbonate phase, with a structure that  
24 is, to the authors knowledge, different from any other compounds. The lattice parameters,  
25 structure, chemistry and stoichiometry are all determined based entirely on the refinement of a  
26 diffraction pattern collected at 97 GPa, however this pattern is not included in this submission.  
27 This makes it very hard to truly evaluate the quality of the refinement or the data - I believe this  
28 must be added before publication, possibly in supplementary information (SI).”

29

30 The structures of these novel iron carbonates were determined not from powder, but from single  
31 crystal diffraction data. We provide now as supplements CIF files which contain all  
32 crystallographic information as required by IUCr.

33

34 “The starting materials in experiments are single crystals of FeCO<sub>3</sub>, however it is unclear  
35 whether the product Fe<sub>4</sub>C<sub>3</sub>O<sub>12</sub> is also a single crystal, or a powder. The authors suggest it is a  
36 single crystal, but without a 2D diffraction image it seems more likely, especially considering the  
37 different stoichiometry of the product, to either be a powder or multiple/twinned crystals.”

38

39 We thank the reviewer to highlight this point. All our structural refinements have been  
40 performed on single crystal domains that we identified in the diffraction patterns, see for  
41 example the 2D image, Fig. S1 in SI (added in the revised version). For instance, we refined the  
42 structure of Fe<sub>4</sub>C<sub>3</sub>O<sub>12</sub> at ~74 GPa after heating at ~1750 K, choosing one out of 4 identified  
43 single crystal domains. This does not mean we did not observe the signature typical for powder  
44 diffraction, however we could identify for all reported data single crystal domains that allowed  
45 us to perform single crystal structural refinement.

46

47 There is very little information provided in the Methods to indicate how the authors proceeded  
48 from a diffraction pattern to full refinement of crystal chemistry. Whilst I understand how this is  
49 feasible, some indication of the steps taken, including any assumptions made and the reasons for  
50 such assumptions should be described in detail, e.g. did the authors use the refined unit cell  
51 volumes to guide stoichiometry, how many missing reflections of the predicted reflections were  
52 there, were there any extra reflections, how did they deal with peaks from unreacted FeCO<sub>3</sub>  
53 starting materials etc.

54 It is also notable that the quality of the refinement for Fe<sub>4</sub>C<sub>3</sub>O<sub>12</sub> is significantly worse than that  
55 for Fe<sub>4</sub>C<sub>4</sub>O<sub>13</sub> (larger GooF, R1). Why is this? This should be discussed. Also, the text says  
56 there were ~300 independent reflections, but Table S1 suggests > 1700...”

57

58 We appreciate Reviewer #1 advise to include in the paper more methodological and technical  
59 details how structural analysis was performed. Fortunately, methodology of single crystal  
60 structural analysis at high pressure (and high temperatures) was rapidly developed over last few  
61 years, and the way “how the authors proceeded from a diffraction pattern to full refinement of  
62 crystal chemistry” is described in numerous publications of some of co-authors of current work  
63 and other colleagues (see, for example, refs. 8,16,23,26,27,39,48,), accumulated in special issues  
64 (particularly, High Pressure Research, 33, 2013), and in PhD Thesis (see, for example,  
65 <https://epub.uni-bayreuth.de/2124/>). It seems not feasible to summarize all these technological  
66 and computational procedures in few sentences. However, the method is currently applied by  
67 several groups, and fully established.

68 We supplement now the manuscript with CIF files (checked by UICr CIFchecker) which is  
69 supposed to address Reviewer's #1 concerns regarding assumptions, number of reflections used,  
70 etc. Please note that Table S2 (former Table S1, which present some data contained in CIFs)  
71 shows the absence of any constrains during structural solution and refinement (it also means that  
72 no assumptions were made to refine chemical composition), number of observables are 6 to 10  
73 times larger than number of determined parameters, and we have quite high redundancy factors  
74 (i.e. number of observed reflection is 4.5-5 times higher than independent one).

75 Using additional experimental data and further analysis we improved quality of structural  
76 refinement of  $\text{Fe}_4\text{C}_3\text{O}_{12}$  as shown in corresponding tables and CIF.

77 Reviewer #1 is absolutely correct, upon laser heating we get several single crystal domains of the  
78 same phase (and we now state it explicitly in the text), but modern crystallographic software  
79 (particularly CrysAlisPro which we are using) can handle this specific cases.

80

81 “Some of these assumptions lead to the conclusion that all the iron in this phase is ferric,  
82 however, if this is the case why are there four components of the mössbauer spectra in Fig S2a?  
83 Surely there should be one from  $\text{FeCO}_3$  and two from  $\text{Fe}_4\text{C}_3\text{O}_{12}$ , and the spectra suggests the  
84 phase is magnetic unless I am mistaken? The authors should comment on this?”

85

86 As we explain above (and as it is also stated in the paper) the chemical composition of  $\text{Fe}_4\text{C}_3\text{O}_{12}$   
87 was determined directly by solving the structure of the material from single crystal X-ray  
88 diffraction data, without any additional assumption. Conclusion that all iron is ferric is made  
89 based on simple count.

90 As we explained in the text, the “accurate Mössbauer spectroscopy characterisation of the pure  
91 phase is difficult due to presence of other iron compounds in the laser-heated samples”. For this  
92 reason it is not trivial to address the magnetic components observed in the spectrum. The intense  
93 magnetic sextet(s) could represent the two Fe-sites in  $\text{Fe}_4\text{C}_3\text{O}_{12}$ , because we did not observe any  
94 magnetic contribution in the Mössbauer spectrum of  $\text{Fe}_4\text{C}_4\text{O}_{13}$  + Fe-oxides that we reported in  
95 Fig. S2b. However, since we could not isolate the orthocarbonate from the other phases we  
96 prefer to do not speculate on the magnetism of this phase for now. We would like also mention  
97 (and this is stated in the text as well) that all components in Mössbauer spectra collected on the  
98 samples containing HP-carbonate phases belongs to iron in high-spin state, and this we consider  
99 as important (and quit robust) result.

100

101 “Given this is the first ever report of this structure, it is rather hard to visualize the structure  
102 using fig 2 alone. Perhaps more views of the structure could be added in SI.”

103 As Reviewer #1 proposes we add a new Fig. 2 with other views of the structures. Moreover, with  
104 this revised version of the manuscript we provide CIF files, so drawing and visualization of the  
105 crystal structure become immediate. Also, with slightly more effort, Table S2 (former Table S1)  
106 contains all necessary information to draw models of crystal structures.

107

108 “It is assumed that this phase is produced in addition to diamond, is there any evidence for this in  
109 the form of debye rings in the diffraction. The authors do mention Raman spectra, but do not  
110 show them, this would be helpful.”

111 It seem to be not feasible to identify unambiguously diamond from weak powder diffraction lines  
112 in very complex environment of strongly scattering iron-bearing phases. As Reviewer #1  
113 proposes we added Raman spectra in SI (Fig. S3).

114

115 “ The methods, in general, are extremely brief. In order to find out several pieces of key  
116 information it was necessary to look up other papers, and I remain uncertain of several points.  
117 The authors shouldn't make it hard for readers in this way.

118 We fully agree with Reviewer #1 and often we experience the same problems reading papers in  
119 journals of Nature series. However, we have to obey Nature Communications rules which stay  
120 “*Methods should be written as concisely as possible*”. So, we did our best to provide “*all*  
121 *elements necessary for interpretation and replication of the results*”. We thank Reviewer #1 for  
122 pointing some weaknesses and try to address concerns as best as we can.

123

124 “How was it verified that there was no temperature gradient across the sample? For instance, the  
125 normal setup on ID-27 (ESRF) uses a 2-5 micron pinhole, and therefore you cannot check this  
126 easily. Do the other setups used also collect temperatures using a pinhole, or do they use a 1D  
127 slit, collecting a profile across the whole sample? Are there examples of these profiles?”

128 Temperature gradients in LH-DAC experiments are often present. They can be generated by  
129 misalignment between laser and X-ray beam, as well as by difference in sample absorption due  
130 to changing sample thickness or surface roughness. Using a small X-ray beam with respect to the  
131 laser-heating beam can prevent these situations, proven that they are well align with respect to  
132 each other and the sample size is smaller than the laser beam hot spot. In all our experiments we  
133 fulfilled these requirements and we feel safe to conclude that in within the measured area we did  
134 not have significant (higher than the reported experimental uncertainties) temperature gradients.  
135 Moreover, in revised version of the manuscript we explicitly state “*Methodological aspects of*  
136 *the high pressure experiments on these beam-lines are well establishe*<sup>8,16,2326,48</sup>”. We explain in  
137 the manuscript that “Crystals (as a rule about 10  $\mu\text{m}$  in diameter) were completely ‘surrounded’  
138 by laser light and there were no measurable temperature gradients within the samples”.



139 The laser heating set-ups at both ID27 (ESRF) and IDD-13 (APS) allow collecting temperature  
140 profile through the heated spot, and we have examples of such profiles. There are already many  
141 examples of such pictures in publications of our and other groups, and we do not think that  
142 adding one more profile (out of hundreds measurements performed during laser heating in this  
143 particular work) could contribute to justify the quality of experiments.

144

145 [“Is it known whether the starting material contain no Fe<sup>3+</sup>? As there is a mixed singlet/doublet  
146 spectrum at RT at 44 GPa, which could be in the starting material, or a partial transition from HS  
147 to LS.”](#)

148 The starting material has no Fe<sup>3+</sup>. The presence of only Fe<sup>2+</sup> has been confirmed by Mossbauer  
149 spectroscopy (Cerantola et al.<sup>19</sup>) and by single crystal diffraction. In fact, the question raised by  
150 Reviewer #1 is addressed in Ref. 19 and we explicitly refer to it.

151 As reported in the caption of Fig. 4 (former Fig. 3), the spectra at 45 GPa have been collected  
152 before (left) and during heating (right) at 570(50) K. The blue doublet corresponds to the high  
153 spin of ferrous iron whereas the red singlet stands for low spin state. The intensity (amount) of  
154 high spin component increases with increasing temperature.

155

156 [“Was recovery of the samples attempted? If so, is it known when they become amorphous/back  
157 transformed? Is this why chemical analysis using FIB, or other, wasn't attempted? Or was it  
158 attempted, as this would significantly strengthen the case for a completely new stoichiometry and  
159 chemistry.”](#)

160 We undertake few attempts to FIB recovered samples, but it proven to be difficult for small  
161 laser-heated crystals and material was lost (note we are not dealing with compact samples  
162 usually recovered after powder diffraction experiments). We continuously try to get TEM data  
163 on recovered materials, but we consider this part of work independent from that we are  
164 presenting here and, in fact, of secondary priority: (a) we obtained data about chemistry and  
165 structure of materials in situ by employing single crystal diffraction analysis (and Mössbauer  
166 spectroscopy as well), and (b) comparison of our results with literature reports show that TEM  
167 analyses of the recovered samples (even in combination with in situ powder diffraction) cannot  
168 provide the full picture of the chemical processes (for example, not all carbonate and oxide  
169 phases were identified) and give information about the crystal structures of the high pressure  
170 materials.

171

172 [“How many independent experiments were there, and what was their individual PT paths? This  
173 particular info would be very helpful if included in a table.](#)

174 How many and which diffraction patterns were single crystal, and how many were powder  
175 patterns?”

176

177 We provide new Table S1 (in SI) which contains information about all data-points shown on Fig.  
178 1.

179

180 “The caption of fig S3 says see methods to explain something that isn't present.”

181 We corrected figures captions and Methods. All necessary references (particularly, #50, #51,  
182 #52, #53, #54 and #56) are provided.

183

184 “The structural transformation sequences of the new tetrahedral carbonates are rather  
185 confusingly presented at the moment. This isn't helped by the confusing nature of Figure 1, and  
186 the poorly defined colours of the various symbols, I think there is an opacity/layering problem  
187 that is affecting the printed colours. Perhaps a key would be useful, rather than just a figure  
188 caption description? A record of the PT paths of each experiment would also be helpful, perhaps  
189 as arrows on the figures.”

190 We did our best to improve the presentation; particularly, Table S1 is now added, and Fig. 1 is  
191 modified taking in to account Reviewer #1 suggestions.

192 “Are the oxide phases that form in addition to Fe<sub>4</sub>C<sub>4</sub>O<sub>13</sub> always consistent? It is mentioned that  
193 they can sometimes be refined from xrd, can we see an example pattern.”

194 The 2D image containing diffraction rings of HP-Fe<sub>3</sub>O<sub>4</sub> is shown in Fig. 3. In Table S5 (former  
195 Table S3) we provide examples of the results of single crystal structural refinements of iron  
196 oxides we found in experiment with iron carbonate – Fe<sub>13</sub>O<sub>19</sub>, HP-Fe<sub>3</sub>O<sub>4</sub>, Fe<sub>5</sub>O<sub>7</sub>, and ppv-Fe<sub>2</sub>O<sub>3</sub>.  
197 We report lattice parameters, space groups, number of detected reflections (range from about 160  
198 to over 400), R-factors, etc. Our results can be directly compared with data from ISCD data-base  
199 (for reader's convenience ref numbers are also provided), and thus phases identification is  
200 unambiguous.

201

202 Line 324 suggests that FeCO<sub>3</sub> transforms directly to Fe<sub>4</sub>C<sub>4</sub>O<sub>13</sub>, which is misleading because  
203 throughout other parts of the manuscript it is argued that it forms from reaction of Fe<sub>4</sub>C<sub>3</sub>O<sub>12</sub>, so  
204 without this precursor it would not form.

205 We did our best to avoid any definite statements if  $\text{Fe}_4\text{C}_4\text{O}_{13}$  may be obtained directly from  
206  $\text{FeCO}_3$ . In particular, we wrote: “Laser heating of  $\text{FeCO}_3$  at temperatures above 1750(100) K at  
207 pressures above  $\sim 74$  GPa resulted in formation not only  $\text{Fe}_4\text{C}_3\text{O}_{12}$  and iron oxides (see below)  
208 but also a monoclinic (space group  $C2/c$ , #15) phase”. Later we explain: “The monoclinic  
209 *diiron(II) diiron(III) tetracarbonate*,  $\text{Fe}_4\text{C}_4\text{O}_{13}$  appear only upon prolonged (about one hour)  
210 laser heating above 1650(100) K”. In the Discussion section we consider different scenario  
211 which could lead to formation of  $\text{Fe}_4\text{C}_4\text{O}_{13}$ , and based on observations propose that it forms  
212 through decomposition of  $\text{Fe}_4\text{C}_3\text{O}_{12}$ . Experimental observations supporting our idea are  
213 presented on Fig. 5, where the progressive heating of  $\text{FeCO}_3$  at different temperatures and  
214 constant pressure ( $\sim 110$  GPa) shows the transformation sequence:  $\text{FeCO}_3 \rightarrow \text{Fe}_4\text{C}_3\text{O}_{12} \rightarrow$   
215  $\text{Fe}_4\text{C}_4\text{O}_{13}$ .

216

217 [Is there evidence for the growth of  \$\text{Fe}\_4\text{C}\_4\text{O}\_{13}\$  at the expense of  \$\text{Fe}\_4\text{C}\_3\text{O}\_{12}\$ , such as the](#)  
218 [strengthening/weakening of diffraction peaks.](#)

219 We obviously see some changes in relative intensities of the reflections, but in the complex  
220 diffraction patterns from mixtures containing several components (some powdered and some  
221 highly spotty polycrystalline) it would be too speculative to draw any conclusions based on such  
222 observations.

223

224 [Are both products always single crystals, as the authors suggest?](#)

225 Yes they are. But of course we observed powdered (or highly textured polycrystalline) patterns  
226 as well. Examples are given i.e. in Fig. 3 (former Fig. 4). See also the new Fig. S1 (added in the  
227 revised version) with the example of  $\text{FeCO}_3$  transformation to  $\text{Fe}_4\text{C}_3\text{O}_{12}$  and observation of new  
228 diffraction spots.

229

230 [Do you ever completely get rid of  \$\text{FeCO}\_3\$  and  \$\text{Fe}\_4\text{C}\_3\text{O}\_{12}\$  in the high T samples with  \$\text{Fe}\_4\text{C}\_4\text{O}\_{13}\$ ?](#)  
231 [If this was the case the final product in the DAC must contain  \$\text{CO}\_2\$ , diamond and an Fe-oxide](#)  
232 [\(e.g.  \$\text{Fe}\_3\text{O}\_4\$ \) alongside the  \$\text{Fe}\_4\text{C}\_4\text{O}\_{13}\$ . If there are Raman spectra is there evidence of this?”](#)

233 In Fig. 1 we show a region of coexistence between  $\text{Fe}_4\text{C}_3\text{O}_{12}$  and  $\text{Fe}_4\text{C}_4\text{O}_{13}$ . However, we have  
234 the case when samples treated at pressures about 100 GPa and temperatures above 2500 K  
235 contain  $\text{Fe}_4\text{C}_4\text{O}_{13}$  and iron oxide(s) ( $\text{Fe}_3\text{O}_4$  and  $\text{Fe}_2\text{O}_3$ ). We did not observe  $\text{CO}_2$  (and did not  
236 expect to observe because it is known that  $\text{CO}_2$  is not stable at such conditions). We could not  
237 find evidences for presence of pure oxygen by diffraction, which is not so surprising – oxygen is  
238 low-Z material in comparison with iron-bearing compounds, and may also dissolve/mix with Ne  
239 pressure medium. As we mentioned in the text (and as it should be evident from Fig. S3 (which

240 is added in this revised version), Raman spectroscopy in the presence of nanocrystalline diamond  
241 (and probably other highly fluorescing products of laser heating experiments) has no chances to  
242 spot oxygen.

243

244 “The order of discussion is a bit clunky. I wanted discussion of potential  
245 decomposition/formation reactions for the various phases to be much earlier, or at least nearer to  
246 the description of the results they are relevant to. I would move the discussion about fitting the  
247 data of Liu et al to after the interpretation of your own results. Whilst the discussion in 2259-281  
248 seemed like it was out of place.”

249 We thank the reviewer for the advise. As Reviewer #1 suggests we re-arrange the Discussion  
250 section, and particularly we wrote a new sub-section which dedicated to incorporation of Mg in  
251 CO<sub>4</sub>-bearing carbonates.

252

253 “From reading the manuscript it is apparent that, if these tetrahedral carbonate phases are going  
254 to form in the mantle, they will have to do so initially from carbonates in cold slabs (if the  
255 reactions you propose are correct). But it is also apparent from the structural fit of Liu et al's  
256 data, that both phases form extensive solid solutions with Mg endmembers. In the case of  
257 tetrairon orthocarbonate, it is clear that Mg significantly expands its stability field at the expense  
258 of the diiron diiron tetracarbonate structure, and to higher T. This goes completely unmentioned  
259 at the moment. Clearly, given the stability fields of the various carbonates, there is a clear PT  
260 path that must be followed for these new phases to form, but once existing they might remain at  
261 geotherm temperatures. This should be discussed more, and is one of the most significant  
262 implications of this work.”

263 We appreciate Reviewer #1 advise to discuss possible stability of Mg,Fe-orthocarbonate along  
264 the geotherm, and we followed this suggestion. However, we also feel that unless solid  
265 experimental evidences are at hands the idea should be formulated with caution.

266

267 “In lines 165-183 incongruent melting is discussed. The authors, like previous authors, suggest  
268 that dissociation of carbonate produces diamond + oxides. However, in this case, the current  
269 results clearly show this "dissociation" occurs above the melting temperature. There is no clear  
270 evidence that this is an equilibrium reaction, or whether it is a quench phenomenon related to the  
271 DAC. It is possible it is related to diffusion in a large thermal gradient, that is accelerated in the  
272 presence of melt. It is certainly clear that it is not dissociation of siderite, this should be  
273 clarified.”

274 We agree with the reviewer that this might not be an equilibrium reaction. Indeed we cannot  
275 exclude that after prolonged heating (several hours, days?)  $\text{FeCO}_3$  will completely decompose to  
276 form  $\alpha\text{-Fe}_2\text{O}_3$  or  $\text{HP-Fe}_3\text{O}_4$ . However, we earnestly described our results. Based on what we  
277 observed there are no evidences that dissociation of siderite is an artifact related to laser heating  
278 in DACs (at least because results in DACs and multi-anvil apparatuses are essentially the same).

279

280 “From the data provided, the values in lines 293 and 294 should be 35.9 and 13.1 respectively.”

281 Corrected.

282

283 “Line 44: Oceanic sediments are not the only flux of carbon into the mantle, much comes from  
284 the oceanic crust and mantle beneath.”

285 Corrected.

286

287 “Line 46: There is no evidence that the diamond-hosted carbonates (calcite and dolomite)  
288 reported in Kaminsky 2012 come from the lower mantle. Those carbonate inclusions are in  
289 diamonds with no other reported inclusions. Thus they categorically do not prove that carbonates  
290 exist in the lower mantle, and I therefore believe this reference is confusing. The nyerereite and  
291 nahcolite inclusions also mentioned in this paper are actually described by Kaminsky (2009, Min  
292 Mag) and were reported as "lower mantle" carbonates. There are other references that report  
293 lower mantle carbonate inclusions, which may or may not actually be from the LM. Several  
294 carbonate microinclusions have been reported in diamonds containing ferropericlase with  
295 magnesite exsolution (e.g. Kaminsky, Can Mineralogist, 2015; Kaminsky, Mineral Petrology,  
296 2015); many authors are currently arguing that these must represent lower mantle samples  
297 because of magnetite exsolution observed within the inclusions, however this still seems far from  
298 clear to me. Magnesite was reported in a diamond with another inclusion interpreted as "former  
299 bridgmanite" (Thomson CTMP 2014). Also, Brenker et al (2007) (EPSL) reported carbonates in  
300 equilibrium with "former calcium perovskite", which may have been from the lower mantle.”

301 We “soften” formulations and provide new references as Reviewer #1 suggests (refs. 6 and 7).

302

303 “Line 60: I don't think Rohrbach and Schmidt actually show slabs will be more oxidised than  
304 surrounding mantle.”

305

306 Rohrbach and Schmidt<sup>14</sup> describe two mechanisms, redox freezing and redox melting, where  
307 carbonatite melts reduce and form diamonds (redox freezing) or diamonds oxidize forming CO<sub>2</sub>  
308 (redox melting). Both processes might happen at the 660 Km-discontinuity where the subducting  
309 lithosphere deflects into the transition zone or stagnate into the lower mantle (redox freezing) or  
310 during upwelling, when the lower mantle constituted mainly by Fe<sup>3+</sup>-rich perovskite oxidizes  
311 diamonds due to the sudden increase in Fe<sup>3+</sup> activity, which is not counterbalanced by an  
312 adequate amount for instance of metal iron (redox melting).

313 In their manuscript, Rohrbach and Schmidt<sup>14</sup> write: “ **Starting from a subducting, locally**  
314 **carbonated relatively oxidized mafic to ultramafic lithosphere**, our experiments demonstrate  
315 that carbonatite melts will be generated in such lithosphere on thermal relaxation”.

316

317 “Kelemen and Manning 2015 actually appear to conclude, based on their figure 5, that  
318 somewhere between none and almost all of the carbonate in slabs is subducted into the mantle.”

319 We appreciate Reviewer #1 comment and incorporate it in the text.

320

321 “There is at least one mistake in Table S4. The final entry was at 97 GPa.”

322 We thank Reviewer #1 for pointing it out, but this is not a mistake – at the moment of data  
323 collection of SMS pressure in the cell was 92(2) GPa.

324

325

326

327

328

## 329 **Reviewer #2**

330 “In this work the authors investigated the behavior of FeCO<sub>3</sub> at pressures over 100 GPa and  
331 temperatures over 2500 K in a laser-heated diamond anvil cell using a combination of single  
332 crystal X-ray diffraction and Mössbauer spectroscopy. The key finding is the discovery of two  
333 new Fe-bearing carbonates, Fe<sub>4</sub>C<sub>3</sub>O<sub>12</sub> and Fe<sub>4</sub>C<sub>4</sub>O<sub>13</sub> which is isostructural with recently  
334 reported Mg<sub>1.6</sub>Fe<sub>2.4</sub>C<sub>4</sub>O<sub>13</sub> by Merlini et al. (2015). The latter observation suggests that ca.  
335 35% of magnesium may be incorporated in the structure and that this structure may be an  
336 important phase to consider in the Earth’s deep interior. The authors conclude that the conditions

337 in the Earth's lower mantle may not lead to full decomposition of Fe-based carbonates - at least  
338 over the time-range of the experiments performed.

339 While the authors attempt to relate these and other findings to the stability of iron-bearing  
340 carbonates in the Earth's deep interior, I found that the manuscript deviated from this theme and  
341 lost its coherency. I suggest, for example, that the details of structure and crystal chemistry of the  
342 newly-discovered iron carbonates be published in another manuscript.”

343

344 We thank Reviewer #2 for the comments, however we do not agree with Reviewer #2 judgment  
345 that manuscript deviate from declared subject – stability of iron-bearing carbonates at conditions  
346 of deep Earth interiors. In fact, we would argue our work clarify the most fundamental question –  
347 could iron carbonates sustain pressure-temperature conditions of lower mantle, and if “yes” in  
348 which form they may exist. We demonstrate that self-redox reaction does not lead to the break  
349 down of carbonates to oxides (or elements), but instead results in the formation of more complex  
350 (and unexpected) compounds. We are fully convinced that without unambiguous identification of  
351 the products of the reactions and their phase/structural characterization any possible analysis of  
352 the fate of iron-bearing carbonates in the Earth interior would be just speculations. We are glad  
353 that Editor explicitly “recommend do keep” “presentation of the new crystal chemistry”.

354

355 The details of the spin transition do not need a separate section.

356 As Reviewer #2 proposed we eliminate separate section on the spin crossover.

357

358 “The manuscript should focus on the stability and the thermodynamic conditions of the  
359 decarbonation process in magnesium and iron-bearing carbonates. However, while this  
360 manuscript provides intriguing new details, this remains poorly constrained as seen in Figure 1  
361 which attempts to compile all known data. “

362 We do not understand why Reviewer #2 believes we have to focus on “decarbonation process”.  
363 In fact, instead of “decarbonation” we observed formation of novel carbonates. This result is  
364 unambiguous and clearly reflected on Fig. 1.

365

366 “The reactions depend critically upon the redox conditions and a further discussion of this  
367 subject is warranted.”

368 We agree with Reviewer #2 statement. In the revised version of the manuscript we explain that  
369 while only reaction (5) explicitly depends on oxygen fugacity, all other processes described in

370 section “*Chemical transformations of FeCO<sub>3</sub> at high pressures and temperatures*” may be  
371 affected by redox conditions (or play role of buffering reactions in more complex process  
372 involving iron-bearing carbonates). Moreover, in the view of the recently reported (see for  
373 example Refs. 26,42) fundamental changes in the chemical behaviour of iron-oxygen system at  
374 pressures above ~70 GPa and high temperatures, our results are also calling for detail  
375 investigations of redox processes in lower part of Earth lower mantle and core-mantle boundary.  
376 Here we provide important new findings and information but we perfectly understand that the  
377 effort of one group is not sufficient to fully resolve the problem, and we hope that publication of  
378 our work will promote further studies in the direction also proposed by Reviewer #2.

379



Reviewers' Comments:

Reviewer #1:

Remarks to the Author:

I have read the revised manuscript and replies to the reviewers' comments, and have found the response convincing for the most part, and the authors have certainly managed to address my technical concerns. The key results of Cerantola et al. manuscript can be summarised as:

- The identification and structure determination of  $\text{Fe}_4\text{C}_3\text{O}_{12}$ , the iron endmember of the high pressure carbonate structure reported by Merlini et al (2015).
- The identification and structure determination of  $\text{Fe}_3\text{C}_3\text{O}_{12}$  – a new high pressure carbonate mineral constructed from  $\text{CO}_4$  tetrahedra. It has also been confirmed that "siderite-II" from previous studies likely was this structure.
- That these tetrahedrally coordinated iron carbonates are stable at adiabatic temperatures. Combined with their ability to form partial solid solutions with magnesium-bearing compositions suggests they might exist in the Earth's lower mantle.

The new manuscript appears much improved, and presents a more concise and coherent report of the results. I retain the following issues, which need not necessarily be an impediment to publication of the study:

- In my opinion the authors still do not present a convincing argument demonstrating that there is a mechanism that would allow delivery of oxidised carbon into the deep mantle and thus, do not demonstrate that these new carbonate structures should be expected to be part of the lower mantle assemblage.
- It is not clear whether these structures are stable in mantle bulk compositions, which are much more magnesium-rich even than the study of Merlini et al. (2015). The relevance of endmember iron carbonates is not entirely clear.
- The interpretation of Mössbauer spectra remains confusing. In my opinion, the lack of certainty surrounding this aspect of the manuscript acts to raise doubt, rather than support the key arguments.

Reviewer #2:

Remarks to the Author:

The authors have addressed all of the reviewers comments.

The revised manuscript is acceptable for publication in Nature.

1 **Reviewer #1**

2 “I have read the revised manuscript and replies to the reviewers’ comments, and have found the  
3 response convincing for the most part, and the authors have certainly managed to address my  
4 technical concerns.

5 ...

6 The new manuscript appears much improved, and presents a more concise and coherent report of  
7 the results.”

8 We appreciate Reviewer #1 recognized our effort to improve the manuscript following his/her  
9 advises. We thank Reviewer #1 for supporting the publication of our manuscript.

10

11 “I retain the following issues, which need not necessarily be an impediment to publication of the  
12 study:

13

14 - In my opinion the authors still do not present a convincing argument demonstrating that there is  
15 a mechanism that would allow delivery of oxidised carbon into the deep mantle and thus, do not  
16 demonstrate that these new carbonate structures should be expected to be part of the lower  
17 mantle assemblage”

18 Presence of carbonates in lower mantle is not a hypothesis – it is proven by the finding of  
19 carbonates inclusions in diamonds (see, for example, Kaminsky F. (2012) Mineralogy of the  
20 lower mantle: a review of 'superdeep' mineral inclusions in diamond. Earth Sci. Rev. 110. 127–  
21 147, now added as a reference in the main text, Ref. 8) In our manuscript we report two new  
22 structures characterized by C-O tetramers with different degrees of polymerization (ortho- and  
23 tetracarbonate structures), and clearly demonstrate their stability at lower mantle conditions.  
24 Thus we provide evidence that certain form of carbonates may be present in Earth lower mantle.  
25 Uncover mechanism of their delivery to deep interiors or primordial nature is behind scope of the  
26 work.

27

28 “It is not clear whether these structures are stable in mantle bulk compositions, which are much  
29 more magnesium-rich even than the study of Merlini et al. (2015). The relevance of endmember  
30 iron carbonates is not entirely clear.”

31 We thank Reviewer #1 to point this out, indeed we are aware of this. We performed this study  
32 starting from the FeCO<sub>3</sub> endmember in order to investigate the ultimate case of possible  
33 destabilization of iron-bearing carbonates due to self-redox reaction(s) at conditions of Earth  
34 lower mantle. We found that instead of full decomposition, iron carbonate formed novel

35 compounds and thus we address the stability of Fe-carbonates. Of course, the next natural step is  
36 to study behavior of Mg-rich materials, and it is in focus of our research now.

37

38 “The interpretation of mössbauer spectra remains confusing. In my opinion, the lack of certainty  
39 surrounding this aspect of the manuscript acts to raise doubt, rather than support the key  
40 arguments.”

41

42 We believe Reviewer #1 refers to our attempt to fit the Mössbauer spectrum of the HP-  
43 carbonates phases. We fully agree with Reviewer #1 that analysis of very complex Mössbauer  
44 spectra reported in Fig. S2 is very difficult due to overlap of components from different phases  
45 and different iron species. Still, the data serve its purpose – assignment of possible oxidation  
46 states of iron in laser-heated samples. We are convinced that at the moment there is no any way  
47 to provide better resolved spectra, or spectra of pure phases, at conditions of our experiments.  
48 Thus, we believe that solid experimental data should be reported, with the intent as well to  
49 provide basis for further studies/analysis of different groups.

50

51

## 52 **Reviewer #2**

53 “The authors have addressed all of the reviewers comments.

54

55 The revised manuscript is acceptable for publication in Nature.”

56

57 We thank Reviewer #2 for his support to publish our manuscript in Nature Communications.

58

59
